# Supplementary material for: Lanthanide chains containing the naphthalenyl nitronyl nitroxide radical
Source: Royal Society of Chemistry journal article supplement (doi:10.1039/c9ra06506g), 2019-01-01
Supplement: c9ra06506g1.pdf [file c9ra06506g1.pdf]

## Supporting Information

### Lanthanide Chains containing Naphthalenyl Nitronyl Nitroxide Radical

Charlie V. Sarmiento<sup>a</sup>, Thamyres A. Araujo<sup>b</sup>, Samira G. Reis<sup>b</sup>, Mateus S. de Souza,<sup>b</sup> Rafael A. Allão Cassaro,<sup>c\*</sup> Miguel A. Novak,<sup>a</sup> Maria G.F. Vaz<sup>b\*</sup>

<sup>a</sup> Instituto de Física, Universidade Federal do Rio de Janeiro, Rio de Janeiro, RJ, Brasil

<sup>b</sup> Instituto de Química, Universidade Federal de Fluminense, Niterói, RJ, Brasil

<sup>c</sup> Instituto de Química, Universidade Federal do Rio de Janeiro, Rio de Janeiro, RJ, Brasil

#### Table of contents

|                                                                                                                                                                                                                                                                                                                |          |
|----------------------------------------------------------------------------------------------------------------------------------------------------------------------------------------------------------------------------------------------------------------------------------------------------------------|----------|
| <b>Table S1:</b> Summary of data collection and refinement for <b>1-4</b> .....                                                                                                                                                                                                                                | page S3  |
| <b>Fig. S1:</b> Powder X-ray diffraction pattern for <b>1</b> (blue), <b>2</b> (red) and <b>3</b> (black) and simulated one (green) from the crystal structure of <b>2</b> .....                                                                                                                               | page S4  |
| <b>Fig. S2:</b> Powder X-ray diffraction pattern for <b>4</b> (red) and simulated one (green) from the crystal structure of <b>4</b> .....                                                                                                                                                                     | page S5  |
| <b>Fig. S3:</b> ORTEP view of the asymmetric unit of <b>1-3</b> at 30% of probability. Color code: black, blue, red, green and cyan stands for carbon, nitrogen, oxygen, fluorine atoms and lanthanide (III) ions, respectively. Hydrogen atoms were omitted for clarity .....                                 | page S6  |
| <b>Fig. S4.</b> View of the crystal packing of <b>1-3</b> along the crystallographic <i>b</i> axis emphasizing the arrangement of the two crystallographically non-equivalent chains containing Ln1(green) and Ln2(pink) .....                                                                                 | page S7  |
| <b>Table S2:</b> CSM calculations of the coordination environment of LnO <sub>8</sub> in <b>1-4</b> .....                                                                                                                                                                                                      | page S8  |
| <b>Table S3:</b> Selected bond lengths (Å) and bond angles (°) for <b>1-3</b> .....                                                                                                                                                                                                                            | page S9  |
| <b>Fig. S5:</b> ORTEP view of the asymmetric unit of <b>4</b> at 30% of probability. Color code: black, blue, red, green and cyan stands for carbon, nitrogen, oxygen, fluorine atoms and yttrium (III) ion, respectively. Hydrogen atoms and oxygen atoms from water molecules were omitted for clarity. .... | page S11 |

|                                                                                                                                                                                                                     |          |
|---------------------------------------------------------------------------------------------------------------------------------------------------------------------------------------------------------------------|----------|
| <b>Fig. S6:</b> View of the crystal packing of <b>4</b> along the crystallographic b axis. Hydrogen atoms, methyl and CF <sub>3</sub> groups were omitted for clarity.....                                          | page S12 |
| <b>Fig. S7:</b> Field dependence of magnetization for <b>1</b> at different temperatures. The error bar is shown in the Figure. Solid lines represent the best fit using parameters described in the main text..... | page S13 |
| <b>Fig. S8:</b> Field dependence of magnetization for <b>2</b> (top) and <b>3</b> (bottom) at different temperatures.....                                                                                           | page S14 |
| <b>Fig. S9:</b> Field dependence of magnetization for <b>4</b> at different temperatures. Solid lines represent the best fits using parameters described in the main text.....                                      | page S15 |
| <b>Fig. S10:</b> Temperature dependence of real ( $\chi'$ ) and imaginary ( $\chi''$ ) magnetic susceptibilities at different frequencies for <b>2</b> with solid lines as guide for eyes.....                      | page S16 |
| <b>Fig. S11:</b> Plot of $\tau$ as a function of the reciprocal temperature for <b>2</b> , where black line represents a fit using Arrhenius law.....                                                               | page S17 |
| <b>Fig. S12:</b> The Argand plot for compound <b>2</b> , where the lines represent the best fit using a generalized Debye model.....                                                                                | page S18 |
| <b>Table S4.</b> Cole-Cole parameters obtained and used to reproduce the Argand plots.....                                                                                                                          | page S18 |
| <b>Fig. S13:</b> Plot of $\ln(\chi T)$ versus $1/T$ for <b>2</b> at 200 Oe dc field. Solid line corresponds to a linear fit according to an expression described in the main text.....                              | page S19 |
| <b>Fig. S14:</b> Plot of $\ln(\chi T)$ versus $1/T$ for <b>3</b> at 200 Oe dc field. Solid line corresponds to a linear fit according to an expression described in the main text.....                              | page S20 |
| <b>Fig. S15:</b> Temperature dependence of $\chi'$ and $\chi''$ at different frequencies at zero applied dc field for <b>3</b> . Solid lines are guide for eyes.....                                                | page S21 |
| <b>References</b> .....                                                                                                                                                                                             | page S22 |

**Table S1:** Summary of data collection and refinement for **1-4**

| Identification                                             | (1)                                                                             | (2)                                                                             | (3)                                                                             | (4)                                                                              |
|------------------------------------------------------------|---------------------------------------------------------------------------------|---------------------------------------------------------------------------------|---------------------------------------------------------------------------------|----------------------------------------------------------------------------------|
| Formula                                                    | C <sub>32</sub> H <sub>22</sub> F <sub>18</sub> GdN <sub>2</sub> O <sub>8</sub> | C <sub>32</sub> H <sub>22</sub> F <sub>18</sub> DyN <sub>2</sub> O <sub>8</sub> | C <sub>32</sub> H <sub>22</sub> F <sub>18</sub> TbN <sub>2</sub> O <sub>8</sub> | C <sub>49</sub> H <sub>41</sub> F <sub>18</sub> N <sub>4</sub> O <sub>14</sub> Y |
| Fw (g mol <sup>-1</sup> )                                  | 1061.76                                                                         | 1067.01                                                                         | 1063.43                                                                         | 1340.77                                                                          |
| T (K)                                                      | 150(2)                                                                          | 150(2)                                                                          | 294(2)                                                                          | 292(2)                                                                           |
| λ (Å)                                                      | 0.71073                                                                         | 0.71073                                                                         | 0.71073                                                                         | 0.71073                                                                          |
| Crystal system                                             | Monoclinic                                                                      | Monoclinic                                                                      | Monoclinic                                                                      | Triclinic                                                                        |
| Space group                                                | <i>P2<sub>1</sub>/n</i>                                                         | <i>P2<sub>1</sub>/n</i>                                                         | <i>P2<sub>1</sub>/n</i>                                                         | <i>P-1</i>                                                                       |
| a (Å)                                                      | 22.2869(17)                                                                     | 22.2970(9)                                                                      | 22.5914(10)                                                                     | 12.7544(8)                                                                       |
| b (Å)                                                      | 16.8565(15)                                                                     | 16.8233(6)                                                                      | 17.0984(6)                                                                      | 14.3568(10)                                                                      |
| c (Å)                                                      | 22.8736(19)                                                                     | 22.8137(8)                                                                      | 22.9681(10)                                                                     | 19.1732(12)                                                                      |
| α (Deg.)                                                   | 90                                                                              | 90                                                                              | 90                                                                              | 73.103(3)                                                                        |
| β (Deg.)                                                   | 114.560(4)                                                                      | 114.398(2)                                                                      | 114.802(2)                                                                      | 88.416(3)                                                                        |
| γ (Deg.)                                                   | 90                                                                              | 90                                                                              | 90                                                                              | 68.899(3)                                                                        |
| Volume (Å <sup>3</sup> )                                   | 7815.7(11)                                                                      | 7793.4(5)                                                                       | 8053.7(6)                                                                       | 3122.4(4)                                                                        |
| Z                                                          | 8                                                                               | 8                                                                               | 8                                                                               | 2                                                                                |
| ρ <sub>calc</sub> (Mg m <sup>-3</sup> )                    | 1.805                                                                           | 1.819                                                                           | 1.754                                                                           | 1.426                                                                            |
| μ (mm <sup>-1</sup> )                                      | 1.833                                                                           | 2.054                                                                           | 1.888                                                                           | 1.047                                                                            |
| <i>F</i> (000)                                             | 4144                                                                            | 4160                                                                            | 4152                                                                            | 1352                                                                             |
| θ range (Deg.)                                             | 2.009-25.462                                                                    | 2.060-26.452                                                                    | 2.043-25.349                                                                    | 2.203-23.256                                                                     |
| Index ranges                                               | -26 ≤ h ≤ 26                                                                    | -27 ≤ h ≤ 27                                                                    | -27 ≤ h ≤ 27                                                                    | -14 ≤ h ≤ 14                                                                     |
|                                                            | -17 ≤ k ≤ 20                                                                    | -21 ≤ k ≤ 21                                                                    | -20 ≤ k ≤ 20                                                                    | -15 ≤ k ≤ 15                                                                     |
|                                                            | -27 ≤ l ≤ 26                                                                    | -26 ≤ l ≤ 28                                                                    | -27 ≤ l ≤ 27                                                                    | -21 ≤ l ≤ 21                                                                     |
| Data collected                                             | 99215                                                                           | 151546                                                                          | 453485                                                                          | 47995                                                                            |
| Independent reflections                                    | 14399                                                                           | 15994                                                                           | 14753                                                                           | 8647                                                                             |
| R <sub>int</sub>                                           | 0.0681                                                                          | 0.0759                                                                          | 0.1202                                                                          | 0.0772                                                                           |
| Data/restraints/parameters                                 | 14399 / 144 / 1119                                                              | 15994 / 144 / 1101                                                              | 14753 / 48 / 1126                                                               | 8647 / 72 / 802                                                                  |
| GOF on <i>F</i> <sup>2</sup>                               | 1.064                                                                           | 1.094                                                                           | 1.207                                                                           | 1.006                                                                            |
| R1,wR2 [ <i>I</i> > 2σ( <i>I</i> )]                        | 0.0731, 0.1559                                                                  | 0.0477, 0.0996                                                                  | 0.0595, 0.1235                                                                  | 0.1023, 0.2283                                                                   |
| R1,wR2 (all)                                               | 0.1002, 0.1729                                                                  | 0.0776, 0.11196                                                                 | 0.0871, 0.1410                                                                  | 0.1288, 0.2459                                                                   |
| Δρ <sub>max</sub> , Δρ <sub>min</sub> (e·Å <sup>-3</sup> ) | 4.209, -3.973                                                                   | 2.369, -1.544                                                                   | 2.544, -1.505                                                                   | 0.951, -0.753                                                                    |

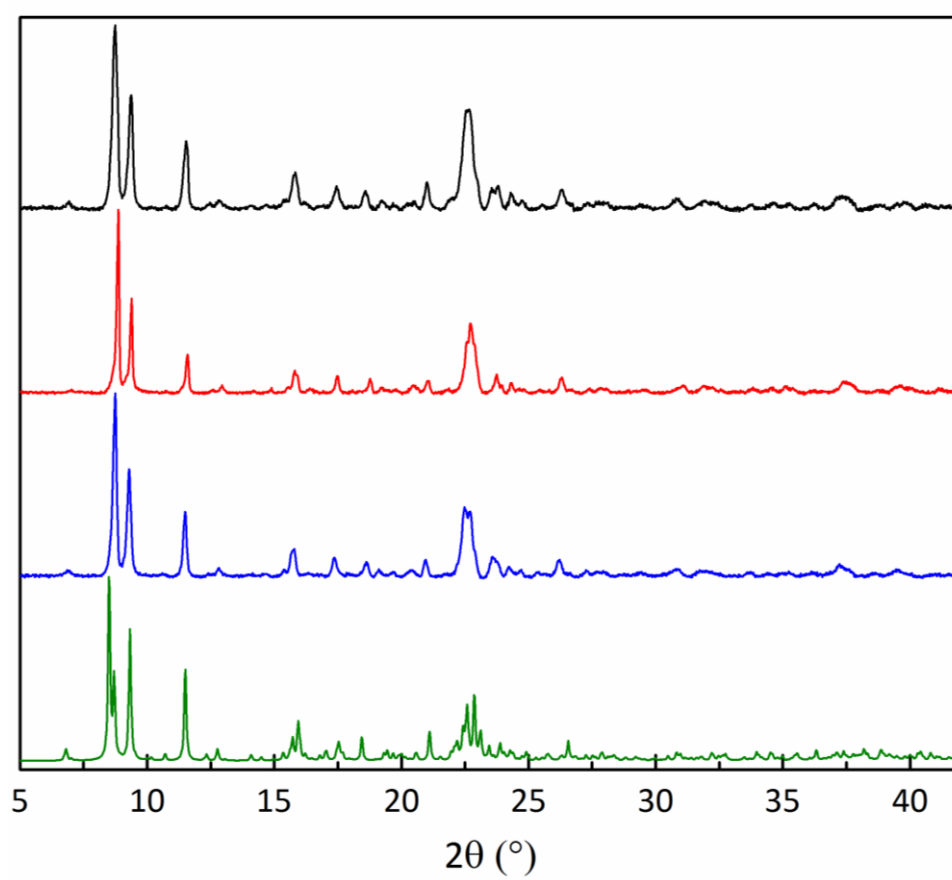

**Fig. S1.** Powder X-ray diffraction pattern for **1** (blue), **2** (red) and **3** (black) and simulated one (green) from the crystal structure of **2**.

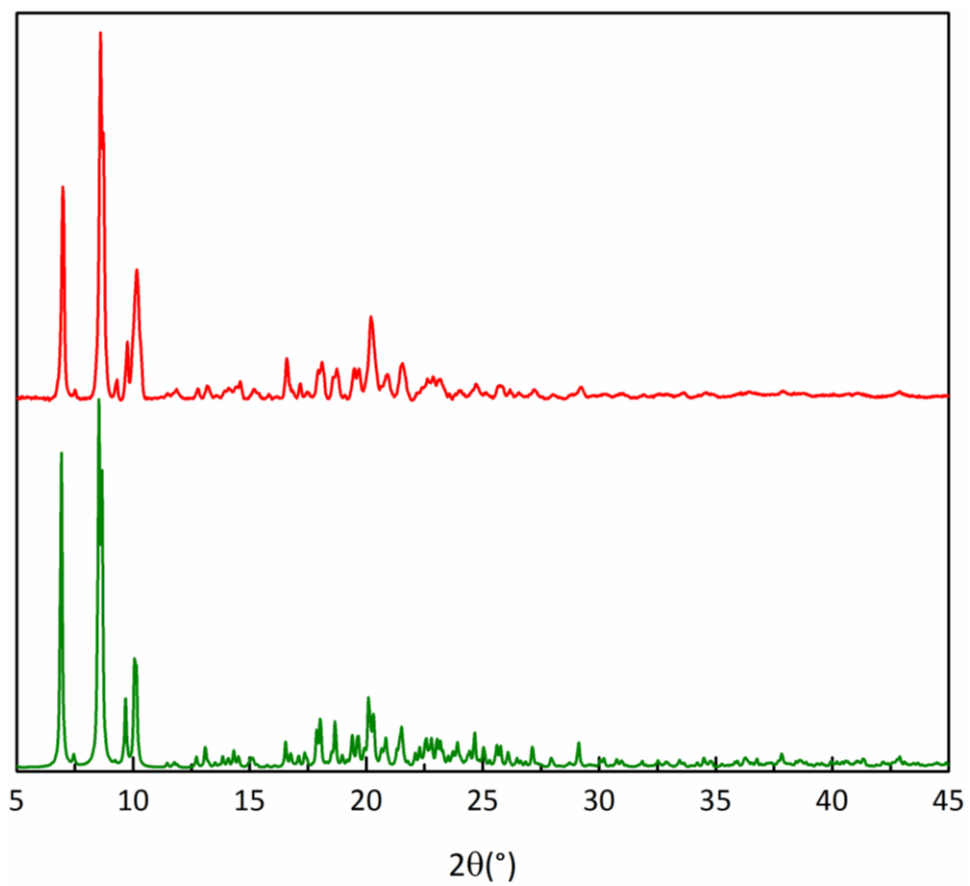

**Fig. S2:** Powder X-ray diffraction pattern for **4** (red) and simulated one (green) from the crystal structure of **4**.

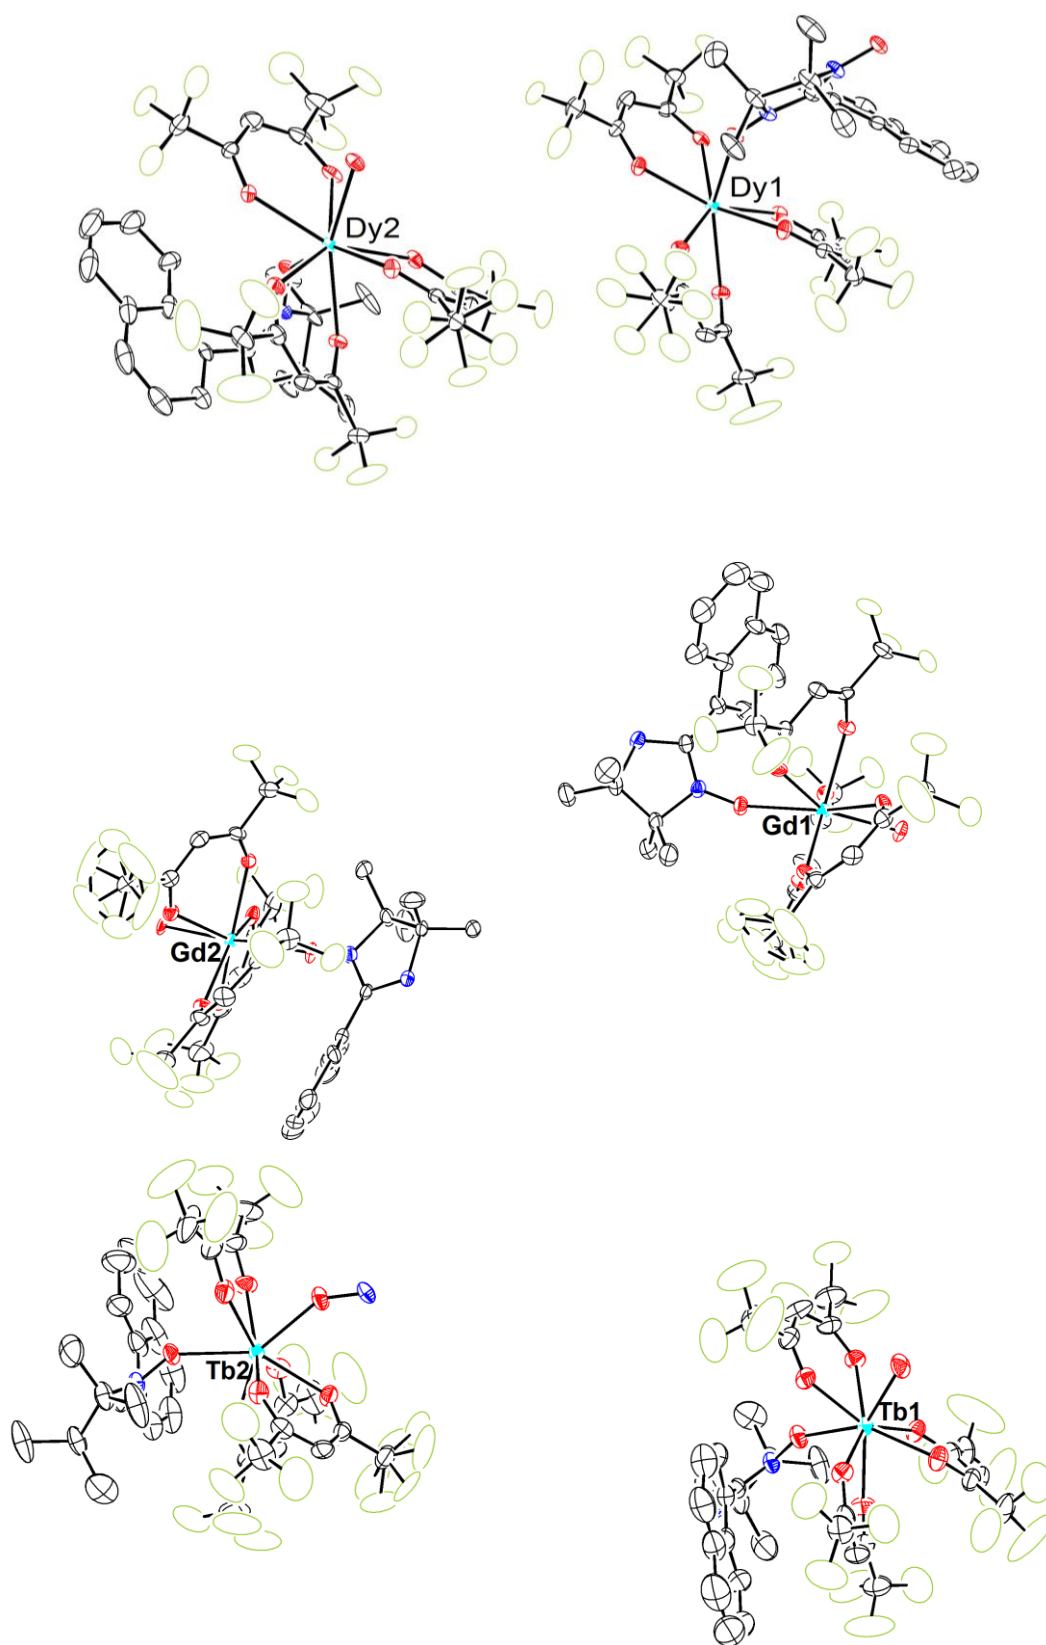

**Fig. S3.** : ORTEP view of the asymmetric unit of **1-3** at 30% of probability. Color code: black, blue, red, green and cyan stands for carbon, nitrogen, oxygen, fluorine atoms and lanthanide (III) ions, respectively. Hydrogen atoms were omitted for clarity.

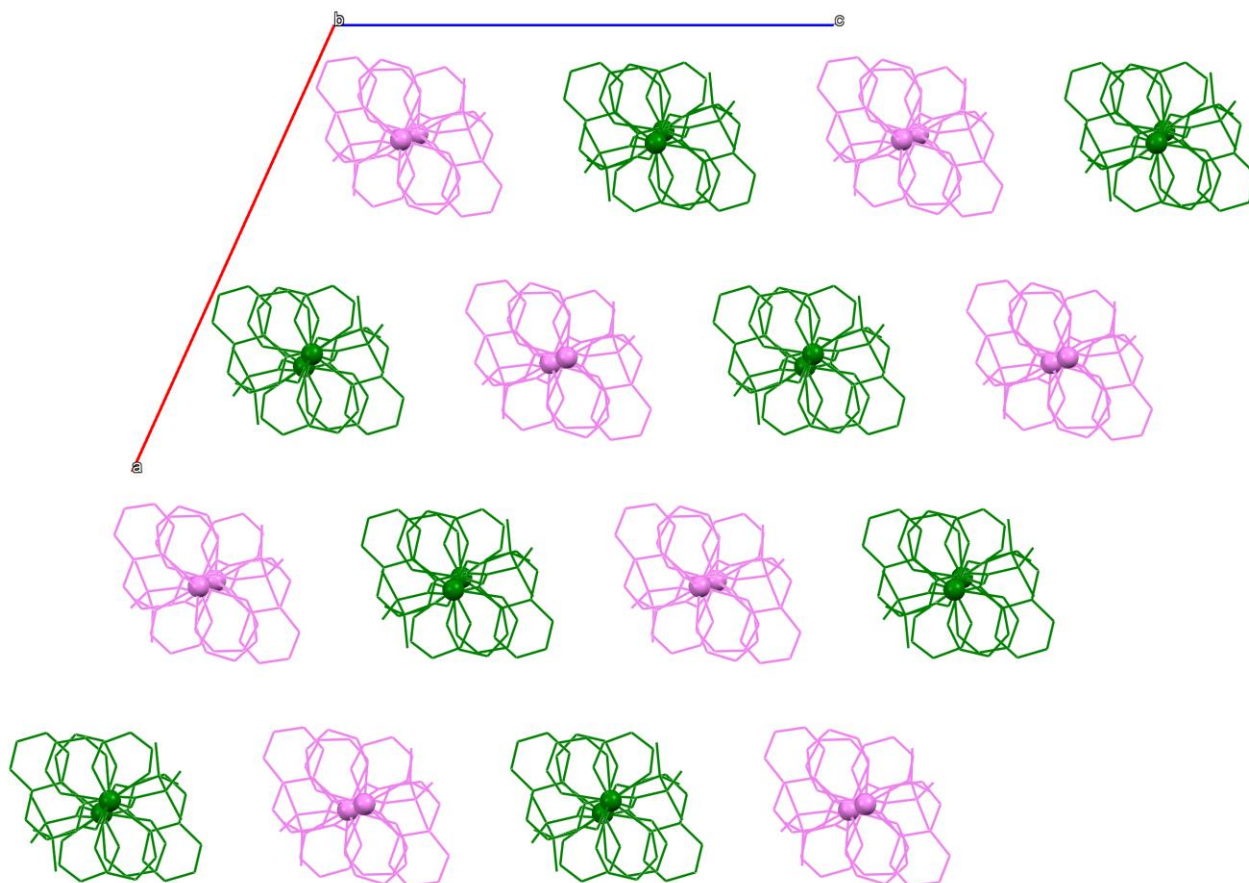

**Fig. S4.** View of the crystal packing of **1-3** along the crystallographic *b* axis emphasizing the arrangement of the two crystallographically non-equivalent chains containing Ln1 (green) and Ln2 (pink).

**Table S2:** CSM Calculations of the coordination environment of LnO8 in **1-4**

| <b>Ln ion</b> | <b>OP-8</b> | <b>HPY-8</b> | <b>HBPY-8</b> | <b>CU-8</b> | <b>SAPR-8</b> | <b>TDD-8</b> | <b>JGBF-8</b> | <b>JETBPY-8</b> | <b>JBTPR-8</b> | <b>BTPR-8</b> | <b>JSD-8</b> | <b>TT-8</b> | <b>ETBPY-8</b> |
|---------------|-------------|--------------|---------------|-------------|---------------|--------------|---------------|-----------------|----------------|---------------|--------------|-------------|----------------|
| Gd1           | 29.667      | 23.490       | 14.401        | 7.951       | 1.850         | <b>0.443</b> | 14.546        | 27.648          | 2.681          | 2.091         | 3.217        | 8.779       | 23.028         |
| Gd2           | 30.524      | 22.967       | 13.062        | 7.957       | 2.690         | <b>0.612</b> | 13.363        | 27.372          | 3.037          | 2.186         | 3.583        | 8.693       | 22.839         |
| Dy1           | 29.690      | 23.762       | 14.616        | 7.896       | 1.801         | <b>0.366</b> | 14.743        | 28.158          | 2.665          | 2.056         | 3.157        | 8.725       | 23.393         |
| Dy2           | 30.773      | 23.228       | 13.251        | 7.856       | 2.705         | <b>0.500</b> | 13.741        | 27.961          | 2.999          | 2.168         | 3.479        | 8.599       | 23.141         |
| Tb1           | 30.248      | 23.410       | 14.710        | 8.130       | 2.193         | <b>0.279</b> | 14.220        | 28.555          | 2.712          | 2.101         | 2.969        | 8.967       | 23.577         |
| Tb2           | 30.974      | 23.284       | 13.617        | 8.154       | 2.750         | <b>0.450</b> | 14.042        | 28.143          | 2.970          | 2.147         | 3.367        | 8.893       | 23.680         |
| Y1            | 30.387      | 24.433       | 15.032        | 8.042       | 1.873         | <b>0.192</b> | 14.674        | 28.891          | 2.480          | 2.035         | 2.665        | 8.827       | 24.479         |

OP-8 Octagon; HPY-8 Heptagonal pyramid; HBPY-8 Hexagonal bipyramid; CU-8 Cube; SAPR-8 Square antiprism; TDD-8 Triangular dodecahedron; JGBF-8 Johnson gyrobifastigium J26; JETBPY-8 Johnson elongated triangular bipyramid J14, JBTPR-8 Biaugmented trigonal prism J50; BTPR-8 Biaugmented trigonal prism; JSD-8 Snub diphenooid J84; TT-8 Triakis tetrahedron; ETBPY-8 Elongated trigonal bipyramid.



**Table S3:** Selected bond lengths (Å) and bond angles (°) for **1-3**.

| Bond lengths |          |                         |            |                         |            |
|--------------|----------|-------------------------|------------|-------------------------|------------|
| 1            |          | 2                       |            | 3                       |            |
| Gd1—O1       | 2.379(6) | Dy1—O1                  | 2.355(4)   | Tb1—O1                  | 2.365(5)   |
| Gd1—O2       | 2.372(6) | Dy1—O2                  | 2.333(4)   | Tb1—O2                  | 2.353(5)   |
| Gd1—O3       | 2.336(6) | Dy1—O3                  | 2.316(4)   | Tb1—O3                  | 2.319(5)   |
| Gd1—O4       | 2.389(7) | Dy1—O4                  | 2.371(4)   | Tb1—O4                  | 2.380(6)   |
| Gd1—O5       | 2.413(6) | Dy1—O5                  | 2.387(4)   | Tb1—O5                  | 2.404(6)   |
| Gd1—O6       | 2.361(7) | Dy1—O6                  | 2.328(4)   | Tb1—O6                  | 2.332(5)   |
| Gd1—O7       | 2.371(7) | Dy1—O7                  | 2.345(4)   | Tb1—O7                  | 2.353(6)   |
| Gd1—O8       | 2.395(7) | Dy1—O8 <sup>a</sup>     | 2.378(4)   | Tb1—O8                  | 2.397(6)   |
| Gd2—O9       | 2.351(7) | Dy2—O9                  | 2.334(4)   | Tb2—O9                  | 2.344(6)   |
| Gd2—O10      | 2.367(7) | Dy2—O10                 | 2.341(4)   | Tb2—O10                 | 2.351(6)   |
| Gd2—O11      | 2.362(7) | Dy2—O11                 | 2.351(4)   | Tb2—O11                 | 2.355(5)   |
| Gd2—O12      | 2.368(7) | Dy2—O12                 | 2.345(4)   | Tb2—O12                 | 2.350(5)   |
| Gd2—O13      | 2.366(7) | Dy2—O13                 | 2.340(4)   | Tb2—O13                 | 2.351(6)   |
| Gd2—O14      | 2.387(7) | Dy2—O14                 | 2.366(4)   | Tb2—O14                 | 2.375(6)   |
| Gd2—O15      | 2.368(6) | Dy2—O15                 | 2.359(4)   | Tb2—O15                 | 2.369(5)   |
| Gd2—O16      | 2.381(7) | Dy2—O16                 | 2.365(4)   | Tb2—O16                 | 2.376(5)   |
| Bond angles  |          |                         |            |                         |            |
| O1—Gd1—O2    | 72.8(2)  | O1—Dy1—O2               | 73.44(14)  | O1—Tb1—O2               | 72.83(19)  |
| O1—Gd1—O3    | 70.6(2)  | O1—Dy1—O3               | 70.43(14)  | O1—Tb1—O3               | 71.47(19)  |
| O4—Gd1—O1    | 125.4(2) | O4—Dy1—O1               | 125.26(15) | O4—Tb1—O1               | 127.3(2)   |
| O1—Gd1—O5    | 127.4(2) | O1—Dy1—O5               | 127.95(14) | O1—Tb1—O5               | 127.52(19) |
| O1—Gd1—O6    | 152.1(2) | O1—Dy1—O6               | 151.84(14) | O1—Tb1—O6               | 150.82(19) |
| O1—Gd1—O7    | 70.6(3)  | O1—Dy1—O7               | 71.47(15)  | O1—Tb1—O7               | 71.6(2)    |
| O1—Gd1—O8    | 80.3(3)  | O1—Dy1—O8 <sup>a</sup>  | 78.94(15)  | O1—Tb1—O8 <sup>a</sup>  | 79.2(2)    |
| O3—Gd1—O2    | 143.4(2) | O3—Dy1—O2               | 143.82(14) | O3—Tb1—O2               | 144.3(2)   |
| O4—Gd1—O2    | 134.2(2) | O4—Dy1—O2               | 133.40(14) | O4—Tb1—O2               | 133.0(2)   |
| O5—Gd1—O2    | 129.5(2) | O5—Dy1—O2               | 129.76(15) | O5—Tb1—O2               | 130.4(2)   |
| O6—Gd1—O2    | 79.3(2)  | O6—Dy1—O2               | 78.41(15)  | O6—Tb1—O2               | 78.1(2)    |
| O7—Gd1—O2    | 74.9(2)  | O7—Dy1—O2               | 75.45(15)  | O7—Tb1—O2               | 75.7(2)    |
| O8—Gd1—O2    | 68.7(2)  | O8 <sup>a</sup> —Dy1—O2 | 69.02(15)  | O8 <sup>a</sup> —Tb1—O2 | 69.2(2)    |
| O4—Gd1—O3    | 71.7(2)  | O4—Dy1—O3               | 72.47(15)  | O4—Tb1—O3               | 72.00(19)  |
| O5—Gd1—O3    | 74.9(2)  | O5—Dy1—O3               | 74.38(15)  | O5—Tb1—O3               | 74.4(2)    |
| O6—Gd1—O3    | 137.3(2) | O6—Dy1—O3               | 137.73(15) | O6—Tb1—O3               | 137.6(2)   |
| O3—Gd1—O7    | 91.8(2)  | O3—Dy1—O7               | 91.30(15)  | O3—Tb1—O7               | 93.2(2)    |
| O8—Gd1—O3    | 105.8(3) | O8 <sup>a</sup> —Dy1—O3 | 105.20(16) | O8 <sup>a</sup> —Tb1—O3 | 103.9(2)   |
| O4—Gd1—O5    | 76.5(3)  | O4—Dy1—O5               | 76.07(15)  | O4—Tb1—O5               | 75.2(2)    |
| O4—Gd1—O6    | 75.5(2)  | O4—Dy1—O6               | 74.99(14)  | O4—Tb1—O6               | 75.6(2)    |
| O4—Gd1—O7    | 147.5(2) | O4—Dy1—O7               | 147.36(15) | O4—Tb1—O7               | 146.5(2)   |
| O4—Gd1—O8    | 73.7(3)  | O4—Dy1—O8 <sup>a</sup>  | 73.64(15)  | O4—Tb1—O8 <sup>a</sup>  | 73.6(2)    |
| O6—Gd1—O5    | 71.5(2)  | O6—Dy1—O5               | 72.16(14)  | O6—Tb1—O5               | 71.4(2)    |
| O5—Gd1—O7    | 72.2(3)  | O5—Dy1—O7               | 72.29(15)  | O5—Tb1—O7               | 71.8(2)    |
| O8—Gd1—O5    | 148.1(3) | O8 <sup>a</sup> —Dy1—O5 | 148.14(16) | O8 <sup>a</sup> —Tb1—O5 | 147.5(2)   |
| O6—Gd1—O7    | 102.0(2) | O6—Dy1—O7               | 102.26(15) | O6—Tb1—O7               | 99.2(2)    |
| O6—Gd1—O8    | 90.0(3)  | O6—Dy1—O8 <sup>a</sup>  | 90.50(15)  | O6—Tb1—O8 <sup>a</sup>  | 92.1(2)    |
| O8—Gd1—O7    | 138.7(3) | O8 <sup>a</sup> —Dy1—O7 | 138.85(16) | O8 <sup>a</sup> —Tb1—O7 | 139.9(2)   |
| O10—Gd2—O9   | 72.9(3)  | O10—Dy2—O9              | 73.48(15)  | O10—Tb2—O9              | 73.3(3)    |
| O11—Gd2—O9   | 130.9(2) | O11—Dy2—O9              | 130.61(15) | O11—Tb2—O9              | 131.5(2)   |
| O9—Gd2—O12   | 80.8(3)  | O9—Dy2—O12              | 79.47(15)  | O9—Tb2—O12              | 79.3(2)    |
| O9—Gd2—O13   | 143.1(3) | O9—Dy2—O13              | 143.76(16) | O9—Tb2—O13              | 143.4      |

|             |          |             |            |             |           |
|-------------|----------|-------------|------------|-------------|-----------|
| O14—Gd2—O9  | 134.2(2) | O14—Dy2—O9  | 133.45(2)  | O14—Tb2—O9  | 133.7(2)  |
| O9—Gd2—O15  | 68.1(2)  | O9—Dy2—O15  | 68.32(14)  | O9—Tb2—O15  | 69.0(2)   |
| O9—Gd2—O16  | 72.2(2)  | O9—Dy2—O16  | 72.00(14)  | O9—Tb2—O16  | 72.9      |
| O10—Gd2—O11 | 122.7(2) | O10—Dy2—O11 | 123.28(14) | O10—Tb2—O11 | 123.8(2)  |
| O10—Gd2—O12 | 153.5(2) | O10—Dy2—O12 | 152.75(15) | O10—Tb2—O12 | 152.2(2)  |
| O10—Gd2—O13 | 70.2(2)  | O10—Dy2—O13 | 70.28(15)  | O10—Tb2—O13 | 70.1(2)   |
| O10—Gd2—O14 | 126.9(2) | O10—Dy2—O14 | 127.41(13) | O10—Tb2—O14 | 127.3(2)  |
| O10—Gd2—O15 | 84.8(3)  | O10—Dy2—O15 | 83.66(15)  | O10—Tb2—O15 | 83.8(2)   |
| O10—Gd2—O16 | 72.5(2)  | O10—Dy2—O16 | 73.02(15)  | O10—Tb2—O16 | 72.9(2)   |
| O11—Gd2—O12 | 72.9(2)  | O11—Dy2—O12 | 73.10(14)  | O11—Tb2—O12 | 73.62(19) |
| O11—Gd2—O13 | 72.8(2)  | O11—Dy2—O13 | 72.89(14)  | O11—Tb2—O13 | 73.1(2)   |
| O14—Gd2—O11 | 77.3(2)  | O14—Dy2—O11 | 76.95(14)  | O14—Tb2—O11 | 76.0(2)   |
| O11—Gd2—O15 | 148.4(2) | O11—Dy2—O15 | 148.61(15) | O11—Tb2—O15 | 147.3(2)  |
| O11—Gd2—O16 | 70.6(2)  | O11—Dy2—O16 | 70.88(15)  | O11—Tb2—O16 | 71.2(2)   |
| O13—Gd2—O12 | 136.0(2) | O13—Dy2—O12 | 136.73(15) | O13—Tb2—O12 | 137.3(2)  |
| O14—Gd2—O12 | 74.9(2)  | O14—Dy2—O12 | 74.76(14)  | O14—Tb2—O12 | 75.8(2)   |
| O15—Gd2—O12 | 88.7(2)  | O15—Dy2—O12 | 89.47(14)  | O15—Tb2—O12 | 90.5(2)   |
| O16—Gd2—O12 | 96.4(2)  | O16—Dy2—O12 | 95.73(14)  | O16—Tb2—O12 | 95.2(2)   |
| O14—Gd2—O13 | 71.4(2)  | O14—Dy2—O13 | 72.15(14)  | O14—Tb2—O13 | 71.8(2)   |
| O13—Gd2—O15 | 107.2(3) | O13—Dy2—O15 | 106.58(15) | O13—Tb2—O15 | 105.4(2)  |
| O13—Gd2—O16 | 97.3(3)  | O13—Dy2—O16 | 97.62(15)  | O13—Tb2—O16 | 97.2(2)   |
| O14—Gd2—O15 | 73.1(3)  | O14—Dy2—O15 | 73.30(14)  | O14—Tb2—O15 | 72.7(2)   |
| O14—Gd2—O16 | 147.8(2) | O14—Dy2—O16 | 147.83(15) | O14—Tb2—O16 | 147.2(2)  |
| O15—Gd2—O16 | 138.5(2) | O15—Dy2—O16 | 138.25(15) | O15—Tb2—O16 | 139.7(2)  |

<sup>a</sup> = symmetry operation  $-x+1/2, y+1/2, -z+3/2$

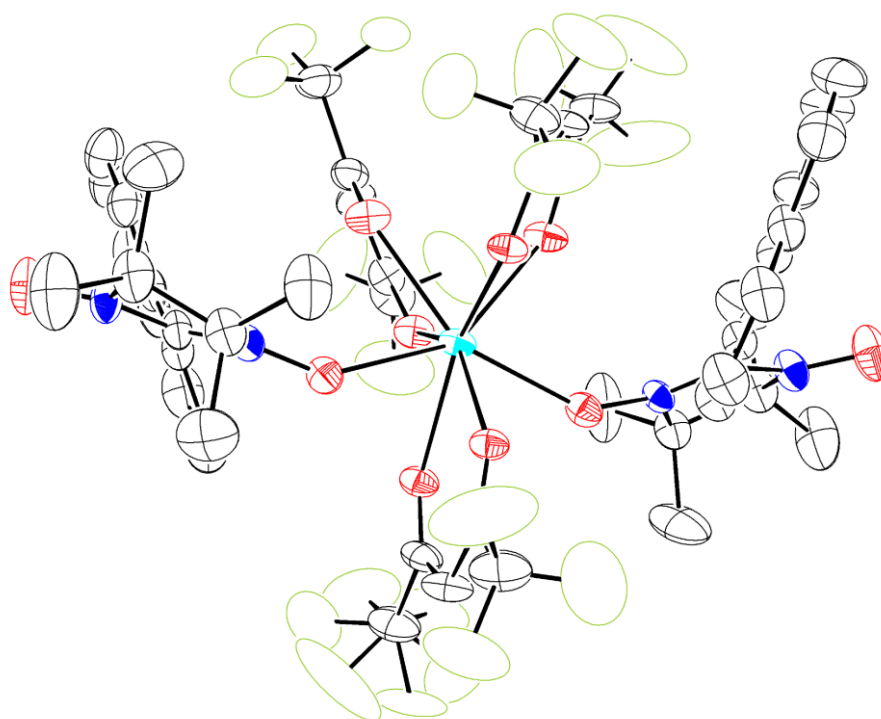

**Fig. S5.** : ORTEP view of the asymmetric unit of **4** at 30% of probability. Color code: black, blue, red, green and cyan stands for carbon, nitrogen, oxygen, fluorine atoms and yttrium (III) ion, respectively. Hydrogen atoms and oxygen atoms from water molecules were omitted for clarity.

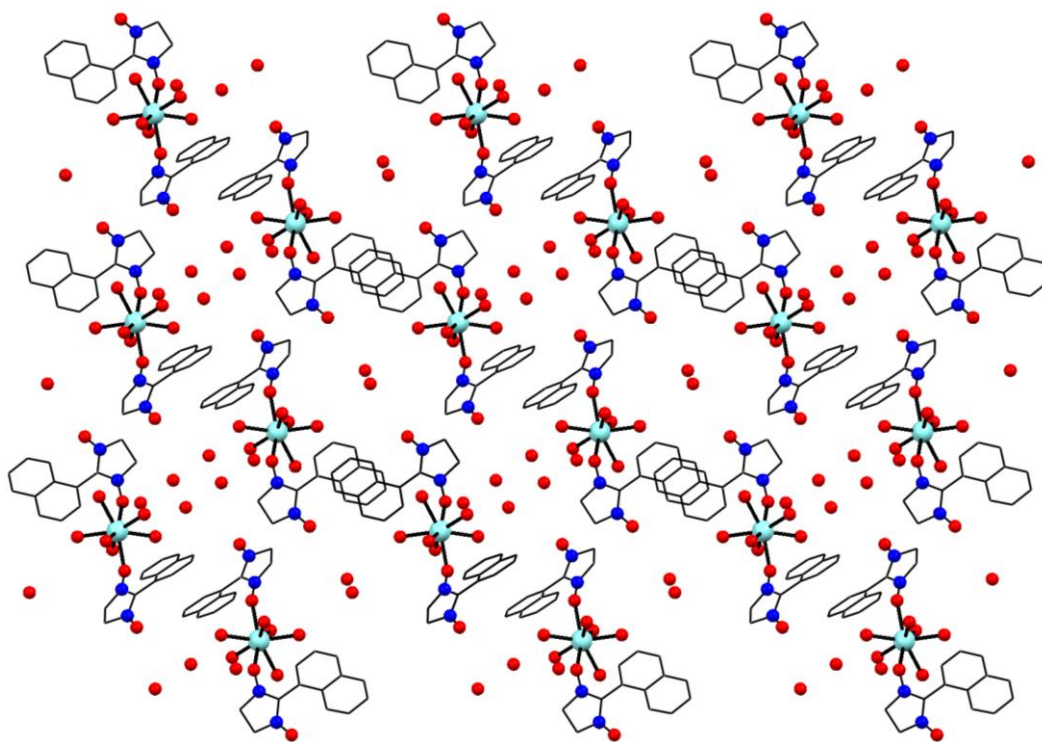

**Fig. S6:** View of the crystal packing of **4** along the crystallographic *b* axis. Hydrogen atoms, methyl and CF<sub>3</sub> groups were omitted for clarity.

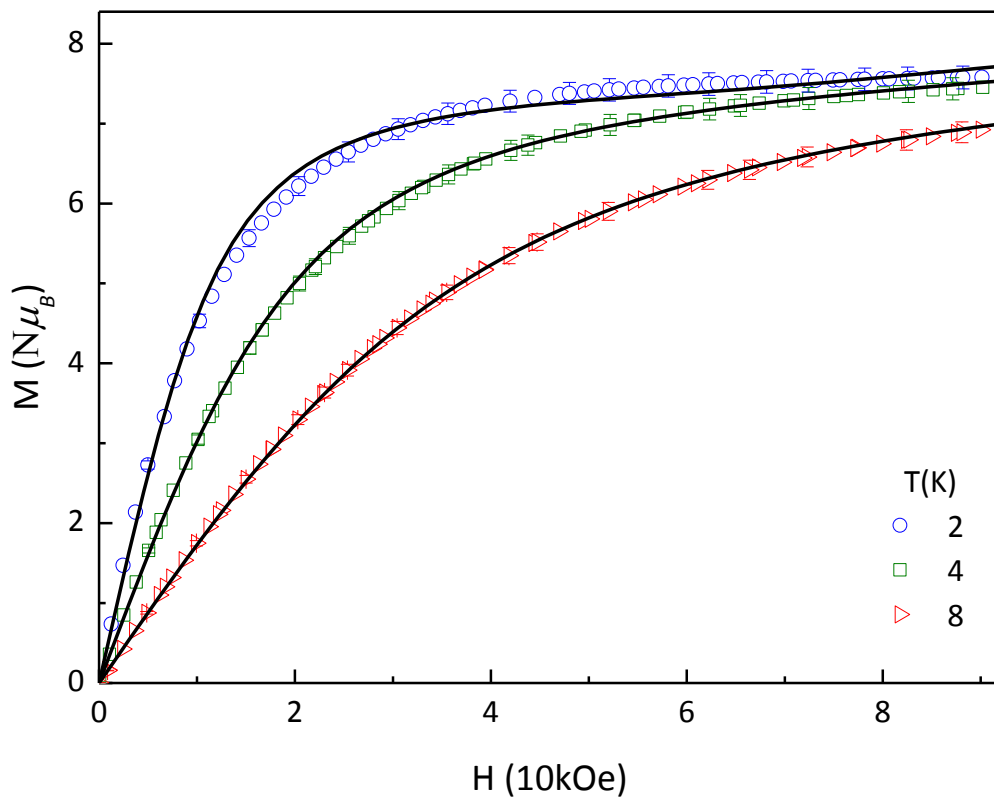

**Fig. S7.** : Field dependence of magnetization for **1** at different temperatures. The error bar is shown in the Figure. Solid lines represent the best fit using parameters described in the main text.

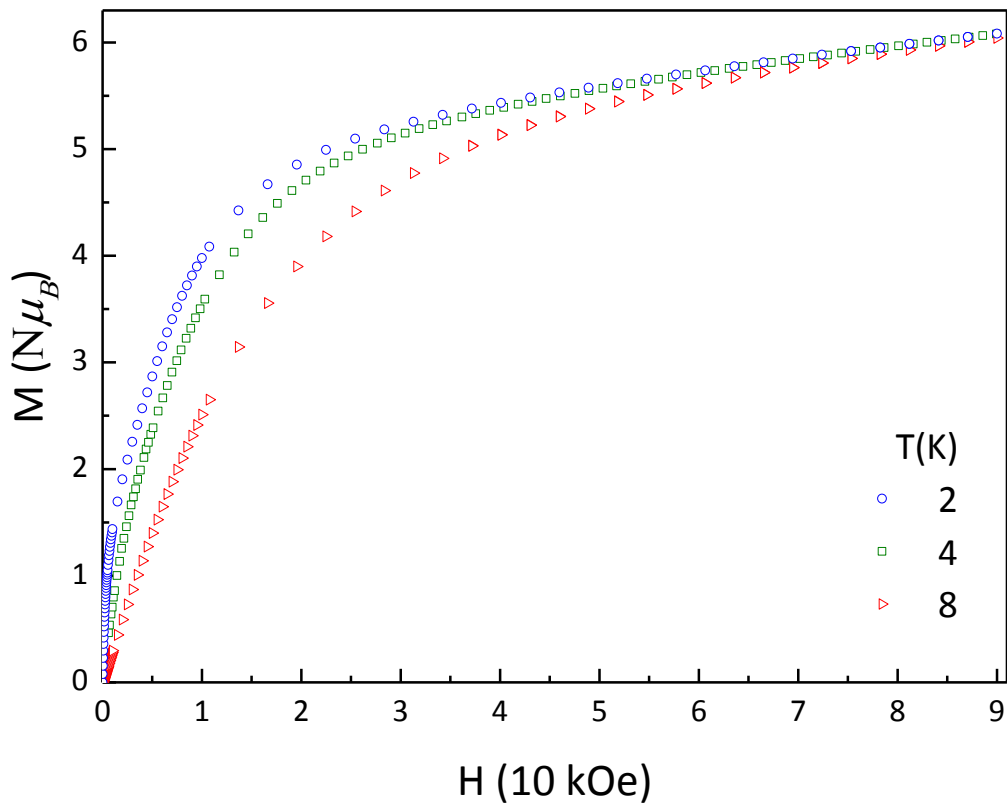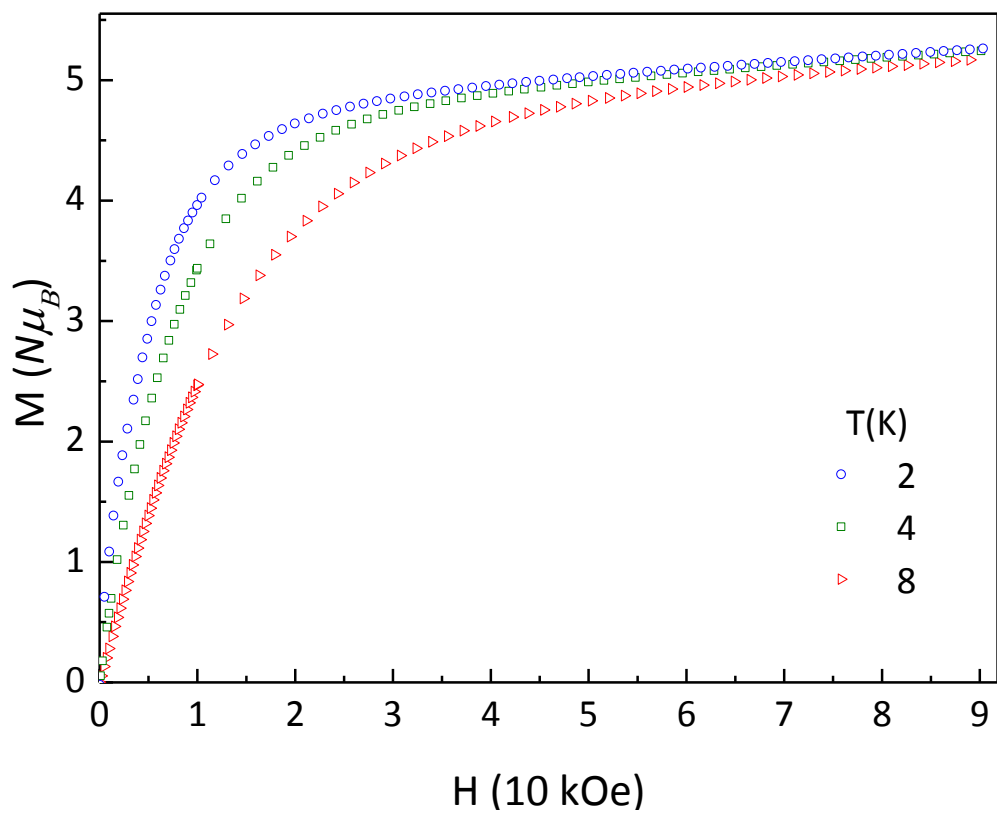

**Fig. S8.** : Field dependence of magnetization for **2** (top) and **3** (bottom) at different temperatures.

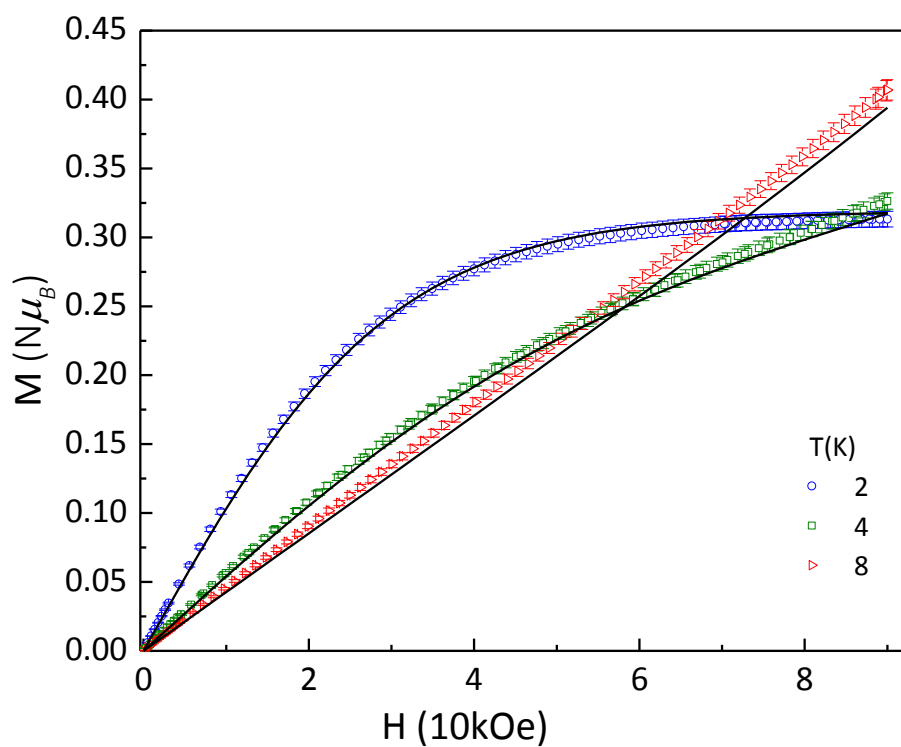

**Fig. S9.** : Field dependence of magnetization for **4** at different temperatures. Solid lines represent the best fits using parameters described in the main text.

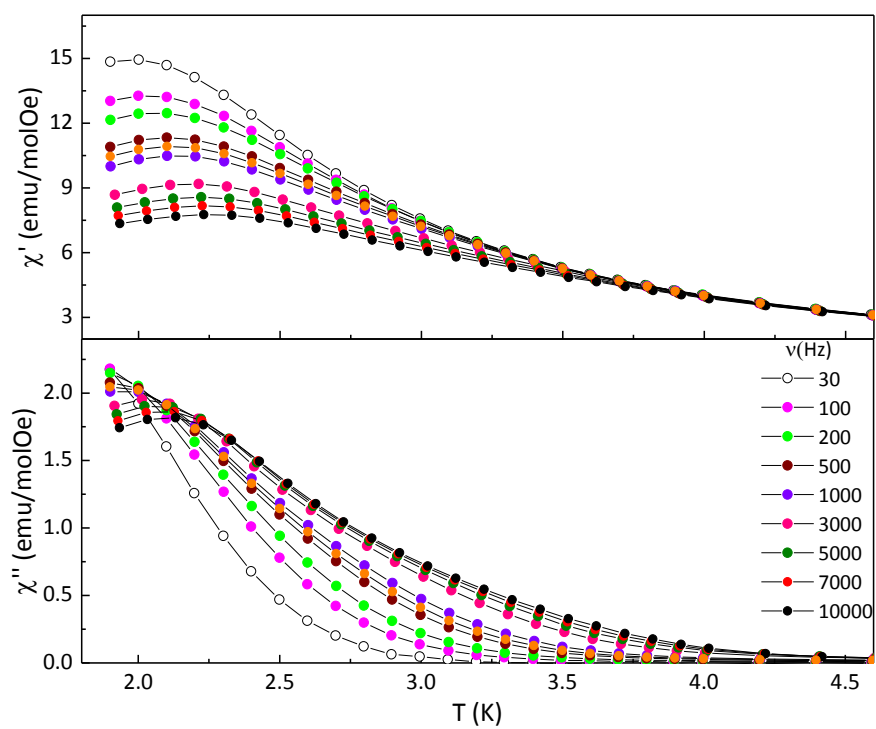

**Fig. S10:** Temperature dependence of real ( $\chi'$ ) and imaginary ( $\chi''$ ) magnetic susceptibilities at different frequencies for **2** with solid lines as guide for eyes.



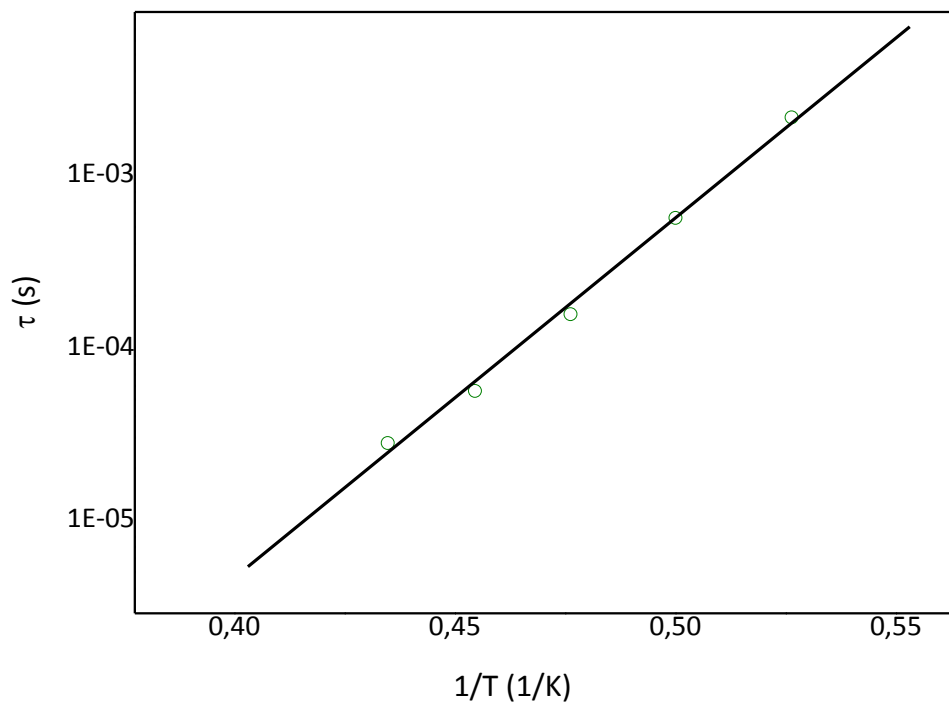

**Fig. S11:** Plot of  $\tau$  as a function of the reciprocal temperature for **2**, where black line represents a fit using Arrhenius law.

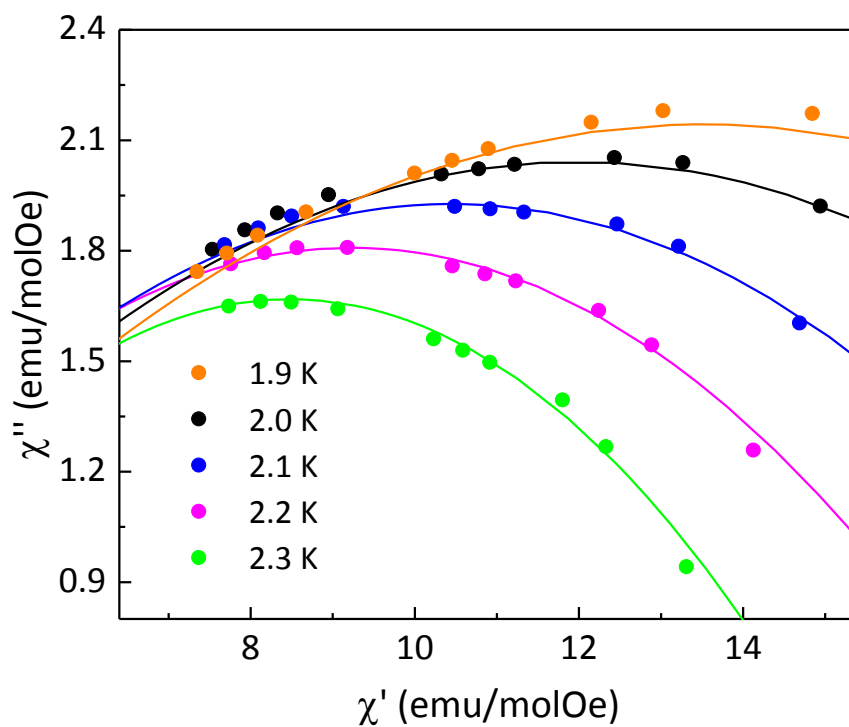

**Fig. S12.** The Argand plot for compound **2**, where the lines represent the best fit using a generalized Debye model.<sup>1</sup>

**Table S4.** Cole-Cole parameters obtained and used to reproduce the Argand plots.

| Temperature (K) | $\chi_s$ (emu/K Oe) | $\chi_T$ (emu/K Oe) | $\alpha$ | $\tau$ (s)           |
|-----------------|---------------------|---------------------|----------|----------------------|
| 1.9             | $5 \times 10^{-10}$ | 27.00               | 0.80     | $2.1 \times 10^{-3}$ |
| 2.0             | $2 \times 10^{-6}$  | 23.98               | 0.79     | $5.6 \times 10^{-4}$ |
| 2.1             | $3 \times 10^{-14}$ | 20.91               | 0.77     | $1.6 \times 10^{-4}$ |
| 2.2             | $1 \times 10^{-3}$  | 18.46               | 0.75     | $5.6 \times 10^{-5}$ |
| 2.3             | 0.9                 | 16.03               | 0.72     | $2.8 \times 10^{-5}$ |

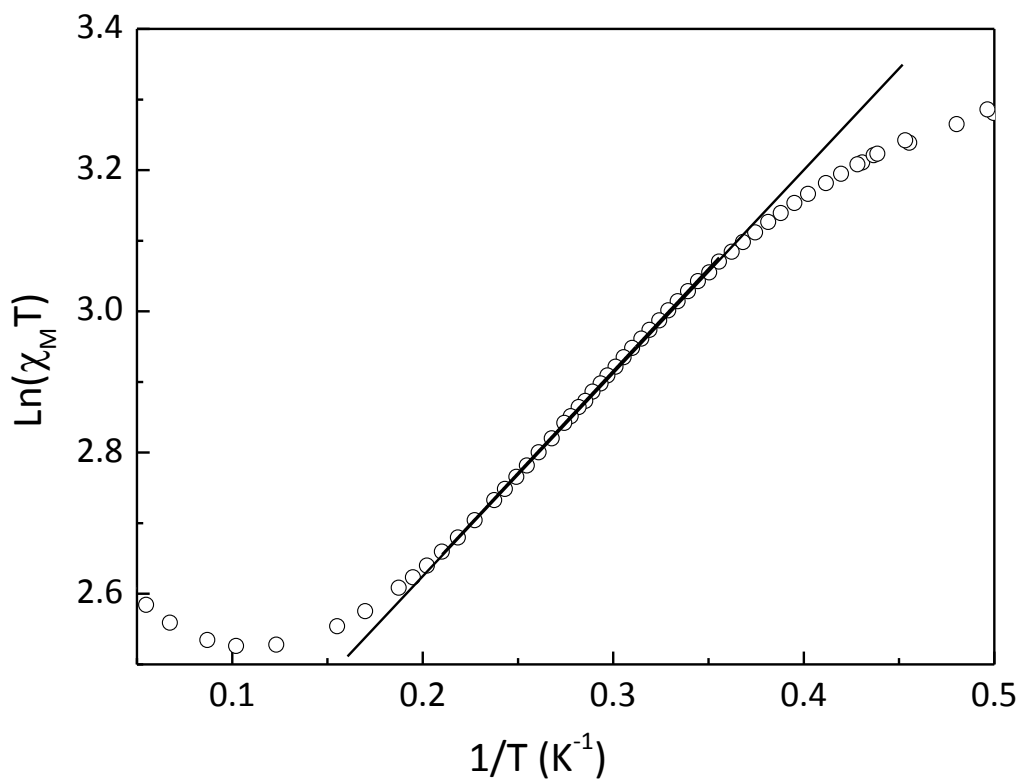

**Fig. S13.** : Plot of  $\ln(\chi T)$  versus  $1/T$  for **2** at 200 Oe dc field. Solid line corresponds to a linear fit according to an expression described in the main text.

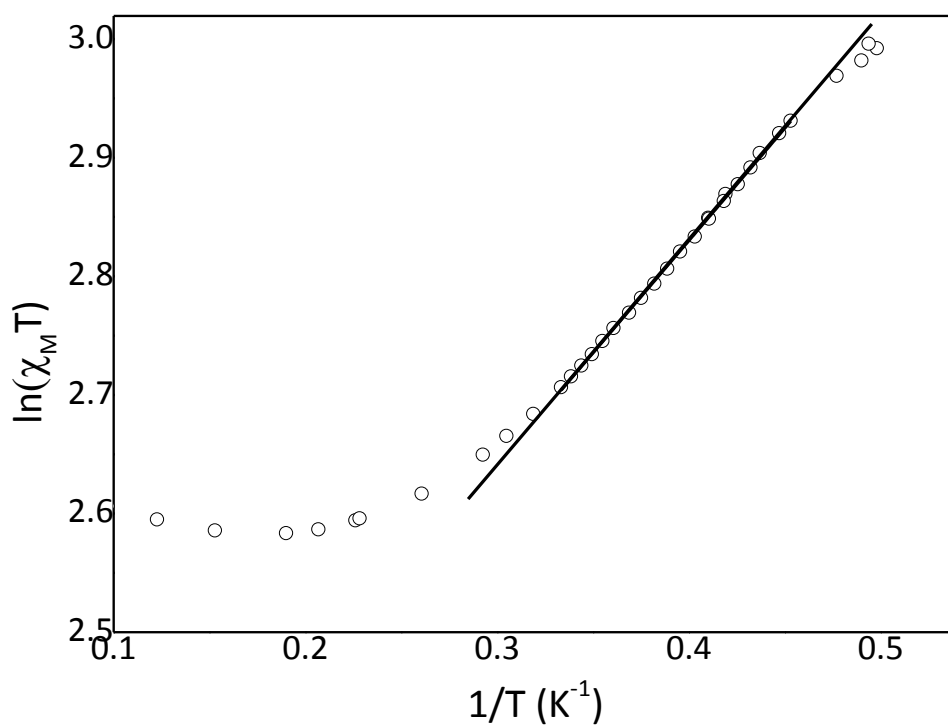

**Fig. S14.** : Plot of  $\ln(\chi T)$  versus  $1/T$  for **3** at 200 Oe dc field. Solid line corresponds to a linear fit according to an expression described in the main text.

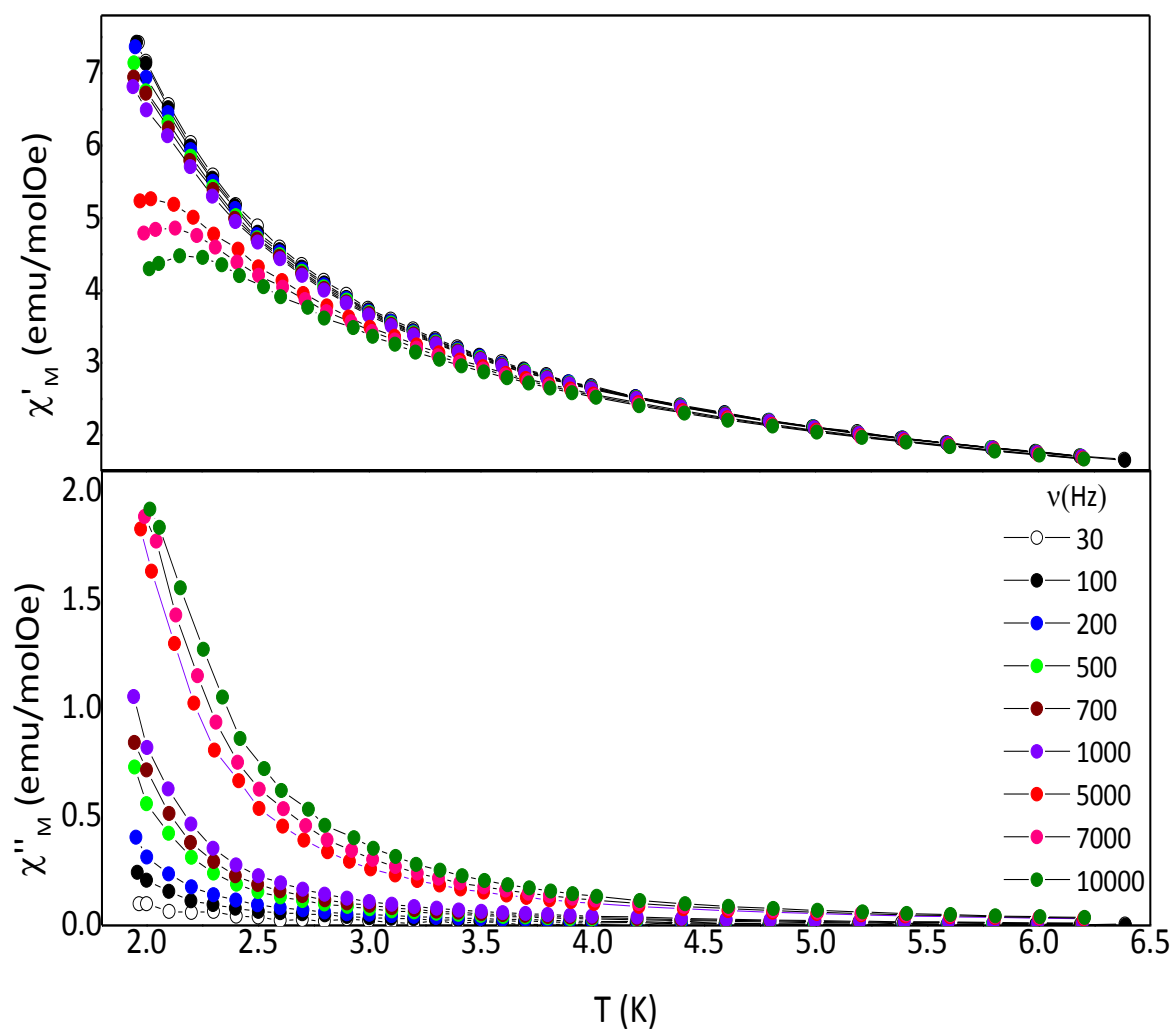

**Fig. S15:** Temperature dependence of  $\chi'$  and  $\chi''$  at different frequencies at zero applied dc field for **3**. Solid lines are guide for eyes.

## References

---

<sup>1</sup>K. S. Cole and R. H. Cole, *J. Chem. Phys.* 1941, **9**, 341-351.
